# Supplementary material
Source: HighWire-hosted journal article supplement (https://www.jneurosci.org/highwire/filestream/599170/field_highwire_adjunct_files/2/SupplTable1.pdf)
Supplement: SupplTable1.pdf [file SupplTable1.pdf]

**Supplementary Table 1:** Comparison of the expression of markers of Type 2 and 3 OFF bipolar cells in single and double KO animals.

| OFF-bipolar subtype | marker    | <i>Vsx1</i> -null | <i>Irx5</i> -null | <i>Vsx1;Irx5</i> double-null |
|---------------------|-----------|-------------------|-------------------|------------------------------|
| Type 2              | recoverin | +                 | +                 | +                            |
|                     | Neto1     | ++                | +++++             | ++                           |
|                     | NK3R      | +++               | +++++             | +++                          |
| Type 3 <sup>#</sup> | CaBP5     | ++                | +                 | +                            |
|                     | PMCA1     | +++++             | +                 | +                            |

+++++ indicates staining similar to wild type

+ indicates strongly reduced or absent staining

# staining of outermost band in the inner plexiform layer previously ascribed to Type 3 axonal termini (Ghosh et al., 2004)
